# Supplementary material for: Profiling of G-Protein Coupled Receptors in Adipose Tissue and Differentiating Adipocytes Offers a Translational Resource for Obesity/Metabolic Research
Source: MDPI journal article supplement (doi:10.3390/cells12030377), 2023-01-19
Supplement: s1 [file s1]

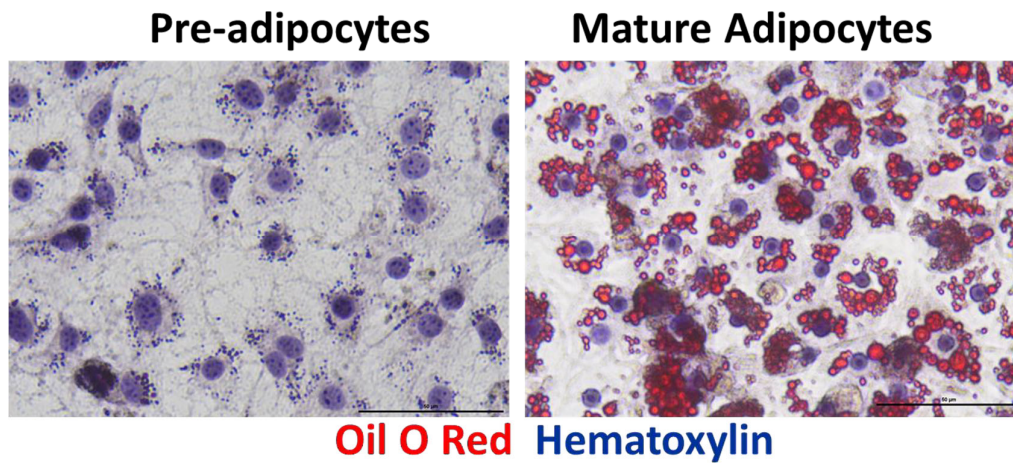

**Figure S1.** Oil-O red staining of 3T3-L1 cells before and after differentiation.

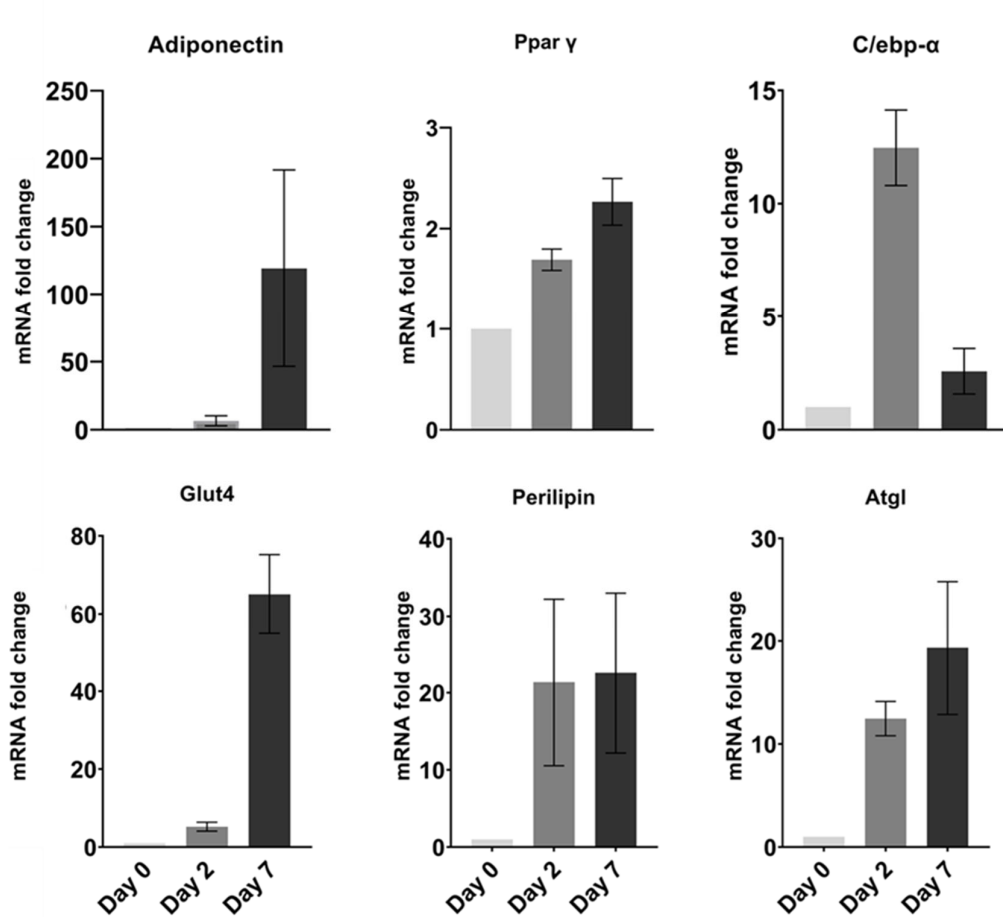

**Figure S2.** Adipogenic differentiation of 3T3 L1 cells and expression of key adipogenic markers. mRNA expression C/EBP- $\alpha$  and PPAR- $\gamma$ , Glut4, Hsl, Atgl, Adiponectin receptor and Adiponectin during the differentiation of 3T3 L1 adipocytes. Each bar represents an average of three independent experiments.

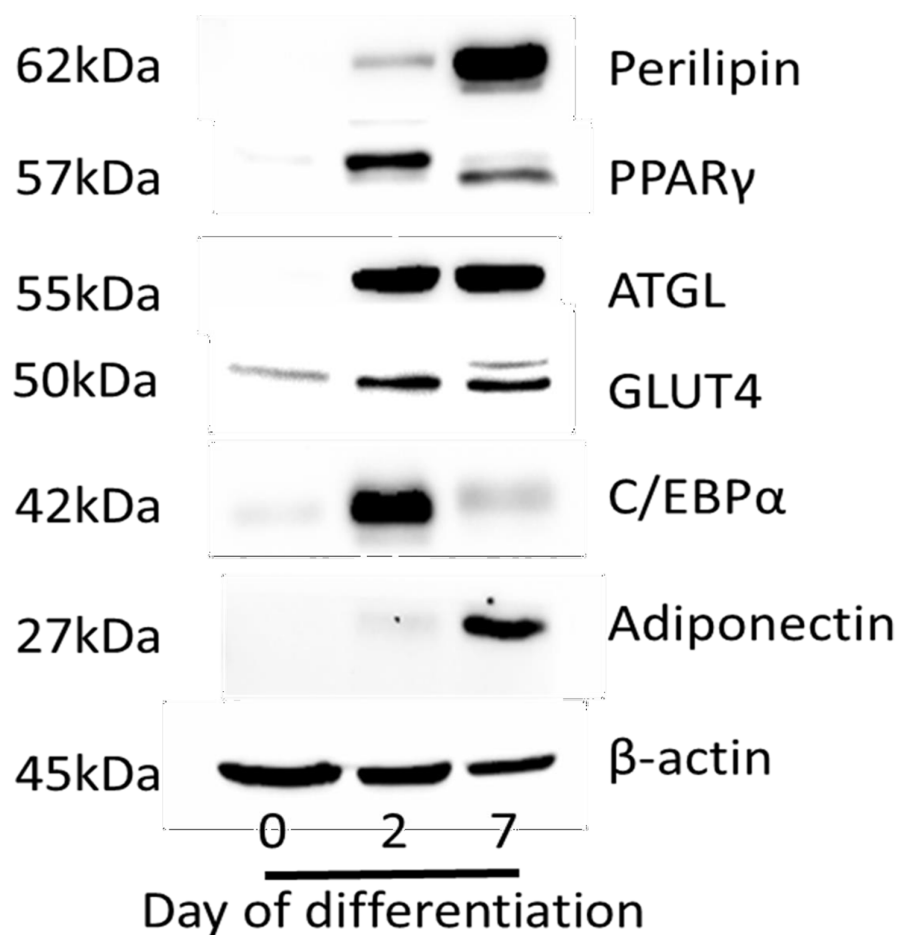

**Figure S3.** Adipogenic differentiation of 3T3 L1 cells and expression of key adipogenic markers. Protein expression C/EBP- $\alpha$  and PPAR- $\gamma$ , Glut4, Hsl, Atgl, Adiponectin receptor and Adiponectin during the differentiation of 3T3 L1 adipocytes.

**Table S1.** Comparison between changes in the expression of GPCRs in human obesity (Dataset # GSE 152992) and Diet-induced obesity in mice (Dataset # 142187).

| Upregulated in Both | Downregulated in Both | Divergent Expression Changes |
|---------------------|-----------------------|------------------------------|
| ACKR2               | ADCYAP1R1             | CALCRL                       |
| ADGRE1              | ADGRB3                | DRD1                         |
| ADGRE2              | ADRB3                 | AVPR1A                       |
| ADGRE5              | HCAR1                 | FPR1                         |
| ADGRG4              | HCAR2                 |                              |
| ADORA3              | EDNRA                 |                              |
| C3AR1               |                       |                              |
| C5AR1               |                       |                              |
| CCR2                |                       |                              |
| CCR3                |                       |                              |
| CCR5                |                       |                              |
| CCR7                |                       |                              |
| CELSR1              |                       |                              |
| CXCR3               |                       |                              |
| CXCR4               |                       |                              |
| F2R                 |                       |                              |
| F2RL2               |                       |                              |
| FZD1                |                       |                              |
| FZD2                |                       |                              |
| GPR132              |                       |                              |
| GPR141              |                       |                              |
| GPR146              |                       |                              |
| GPR183              |                       |                              |
| GPR84               |                       |                              |
| GPR85               |                       |                              |
| GPR88               |                       |                              |
| LPAR5               |                       |                              |
| P2RY10              |                       |                              |
| PTAFR               |                       |                              |
| PTGER4              |                       |                              |
| P2RY14              |                       |                              |
| MRGPRE              |                       |                              |
